# Supplementary material for: Optimized Generation of Primary Human Epithelial Cells from Larynx and Hypopharynx: A Site-Specific Epithelial Model for Reflux Research
Source: PubMed Central journal article supplement — Cell Transplant. 2019 Mar 27;28(5):630–7. doi: 10.1177/0963689719838478 (PMC7103601; doi:10.1177/0963689719838478), 2019-03-27
Supplement: Supplement_material.pdf [file Supplement_material.pdf]

## Supplement material

Table S 1. Antibodies

| Item                 | Manufacturer      | Catalog number | Dilution | Application                 |
|----------------------|-------------------|----------------|----------|-----------------------------|
| anti-pan cytokeratin | Abcam             | ab7753         | 1:125    | Immunofluorescence staining |
|                      |                   |                | 0.5µg/ml | Flow cytometry              |
|                      |                   |                | 1:1000   | Western blot                |
| anti-Ki67            | Abcam             | ab92742        | 1:250    | Immunofluorescence staining |
| Alexa-488            | Life Technologies | #4408          | 1:500    | Immunofluorescence staining |
|                      |                   |                | 1:500    | Flow cytometry              |
| Alexa-555            | Life Technologies | #4413          | 1:500    | Immunofluorescence staining |
